# Supplementary material for: Efficacy of Essential Oil Vapours in Reducing Postharvest Rots and Effect on the Fruit Mycobiome of Nectarines
Source: MDPI journal article supplement (doi:10.3390/jof10050341), 2024-05-08
Supplement: s1 [file s1]

# Supplementary Materials

## Efficacy of Essential Oil Vapours in Reducing Postharvest Rots and Effect on the Fruit Mycobiome of Nectarines

Giulia Remolif <sup>1,2</sup>, Fabio Buonsenso <sup>1,2</sup>, Giada Schiavon <sup>1,2</sup>, Marco Garelo <sup>1,2</sup>, Davide Spadaro <sup>1,2,\*</sup>

<sup>1</sup> Department of Agricultural, Forest and Food Sciences (DISAFA), University of Turin, Largo Paolo Braccini 2, 10095 Grugliasco (Italy)

<sup>2</sup> Interdepartmental Centre for the Innovation in the Agro-environmental Sector - AGROINNOVA, University of Turin, Largo Paolo Braccini 2, 10095 Grugliasco (Italy)

\*Corresponding authors; email address: [davide.spadaro@unito.it](mailto:davide.spadaro@unito.it)

### Content.

**Table S1.** Results of the Adonis analysis on the beta diversity distance matrix. Parameter indicates the parameter or combination of parameters tested, F.model is the test's statistic, R2 is the fraction of variance explained by the parameter and Pr(>F) is the q-value, or FDR (false discovery rate) adjusted p-value. Rejection threshold was set at 0.05. NaN: not available. 2

---

**Table S2.** Significance groups for the results of the pairwise PERMANOVA (Permutational Analysis of Variance) and PERMDISP (Permutational Dispersion Analysis) on the beta diversity distance matrix for all tissue/treatment/sampling timepoint combinations. Rejection threshold for the presence of significant differences was set at 0.05. 3

---

**Table S3.** Results of the pairwise PERMANOVA (Permutational Analysis of Variance) and PERMDISP (Permutational Dispersion Analysis) on the beta diversity distance matrix for all tissue/treatment/sampling timepoint combinations. Pseudo-F and F-value are the PERMANOVA's and PERMDISP's statistics, respectively. Q-value is the FDR (false discovery rate) adjusted p-value. 4

**Table S1.** Results of the Adonis analysis on the beta diversity distance matrix. Parameter indicates the parameter or combination of parameters tested, F.model is the test's statistic, R2 is the fraction of variance explained by the parameter and Pr(>F) is the q-value, or FDR (false discovery rate) adjusted p-value. Rejection threshold was set at 0.05. NaN: not available.

| <b>Parameter</b>                        | <b>F.model</b> | <b>R2</b> | <b>Pr(&gt;F)</b> |
|-----------------------------------------|----------------|-----------|------------------|
| Tissue                                  | 86.62          | 0.44      | 0.001            |
| Treatment                               | 10.34          | 0.11      | 0.001            |
| Sampling timepoint                      | 3.48           | 0.04      | 0.007            |
| Tissue x Treatment                      | 9.27           | 0.09      | 0.001            |
| Tissue x Sampling timepoint             | 4.30           | 0.04      | 0.003            |
| Treatment x Sampling timepoint          | 3.53           | 0.04      | 0.01             |
| Tissue x Treatment x Sampling timepoint | 0.06           | <0.01     | 0.993            |
| Residuals                               | 0.65           | 0.24      | NaN              |
| Total                                   | NaN            | 1         | NaN              |

**Table S2.** Significance groups for the results of the pairwise PERMANOVA (Permutational Analysis of Variance) and PERMDISP (Permutational Dispersion Analysis) on the beta diversity distance matrix for all tissue/treatment/sampling timepoint combinations. Rejection threshold for the presence of significant differences was set at 0.05.

| <b>Group</b>                              | <b>PERMANOVA<br/>significance group</b> | <b>PERMDISP<br/>significance group</b> |
|-------------------------------------------|-----------------------------------------|----------------------------------------|
| Endophytes, Harvest, Untreated control    | a                                       | a                                      |
| Endophytes, Storage, Untreated control    | ab                                      | a                                      |
| Endophytes, Storage, Chemical control     | a                                       | a                                      |
| Endophytes, Storage, Basil EO             | a                                       | a                                      |
| Endophytes, Shelf-life, Untreated control | a                                       | a                                      |
| Endophytes, Shelf-life, Chemical control  | ab                                      | a                                      |
| Endophytes, Shelf-life, Basil EO          | a                                       | a                                      |
| Epiphytes, Harvest, Untreated control     | cde                                     | a                                      |
| Epiphytes, Storage, Untreated control     | bcde                                    | a                                      |
| Epiphytes, Storage, Chemical control      | g                                       | a                                      |
| Epiphytes, Storage, Basil EO              | e                                       | a                                      |
| Epiphytes, Shelf-life, Untreated control  | d                                       | a                                      |
| Epiphytes, Shelf-life, Chemical control   | f                                       | a                                      |
| Epiphytes, Shelf-life, Basil EO           | c                                       | a                                      |

**Table S3.** Results of the pairwise PERMANOVA (Permutational Analysis of Variance) and PERMDISP (Permutational Dispersion Analysis) on the beta diversity distance matrix for all tissue/treatment/sampling timepoint combinations. Pseudo-F and F-value are the PERMANOVA's and PERMDISP's statistics, respectively. Q-value is the FDR (false discovery rate) adjusted p-value.

| Group 1                                | Group 2                                   | Sample size | PERMANOVA |         |         | PERMDISP |         |         |
|----------------------------------------|-------------------------------------------|-------------|-----------|---------|---------|----------|---------|---------|
|                                        |                                           |             | pseudo-F  | p-value | q-value | F-value  | p-value | q-value |
| Endophytes, Harvest, Untreated control | Endophytes, Shelf-life, Basil EO          | 9           | 0.29      | 0.890   | 0.920   | 0.93     | 0.431   | 0.643   |
| Endophytes, Harvest, Untreated control | Endophytes, Shelf-life, Chemical control  | 8           | 0.10      | 0.889   | 0.920   | 0.04     | 0.847   | 0.914   |
| Endophytes, Harvest, Untreated control | Endophytes, Shelf-life, Untreated control | 10          | 0.06      | 0.918   | 0.928   | 0.13     | 0.667   | 0.788   |
| Endophytes, Harvest, Untreated control | Endophytes, Storage, Basil EO             | 8           | 0.26      | 0.904   | 0.924   | 0.61     | 0.563   | 0.712   |
| Endophytes, Harvest, Untreated control | Endophytes, Storage, Chemical control     | 9           | 2.99      | 0.098   | 0.127   | 0.05     | 0.864   | 0.914   |
| Endophytes, Harvest, Untreated control | Endophytes, Storage, Untreated control    | 8           | 4.00      | 0.061   | 0.083   | 0.03     | 0.912   | 0.943   |
| Endophytes, Harvest, Untreated control | Epiphytes, Harvest, Untreated control     | 10          | 11.91     | 0.006   | 0.033   | 0.02     | 0.822   | 0.902   |
| Endophytes, Harvest, Untreated control | Epiphytes, Shelf-life, Basil EO           | 10          | 25.89     | 0.007   | 0.033   | 1.92     | 0.016   | 0.104   |
| Endophytes, Harvest, Untreated control | Epiphytes, Shelf-life, Chemical control   | 10          | 27.75     | 0.013   | 0.033   | 3.48     | 0.009   | 0.100   |
| Endophytes, Harvest, Untreated control | Epiphytes, Shelf-life, Untreated control  | 10          | 22.37     | 0.010   | 0.033   | 1.38     | 0.036   | 0.193   |
| Endophytes, Harvest, Untreated control | Epiphytes, Storage, Basil EO              | 10          | 13.82     | 0.007   | 0.033   | 2.09     | 0.103   | 0.329   |
| Endophytes, Harvest, Untreated control | Epiphytes, Storage, Chemical control      | 10          | 19.64     | 0.010   | 0.033   | 2.42     | 0.011   | 0.100   |
| Endophytes, Harvest, Untreated control | Epiphytes, Storage, Untreated control     | 10          | 7.37      | 0.011   | 0.033   | 0.52     | 0.493   | 0.712   |
| Endophytes, Shelf-life, Basil EO       | Endophytes, Shelf-life, Chemical control  | 7           | 1.00      | 0.455   | 0.538   | 1.39     | 0.262   | 0.495   |
| Endophytes, Shelf-life, Basil EO       | Endophytes, Shelf-life, Untreated control | 9           | 0.21      | 0.882   | 0.920   | 0.31     | 0.720   | 0.840   |
| Endophytes, Shelf-life, Basil EO       | Endophytes, Storage, Basil EO             | 7           | 0.13      | 0.945   | 0.945   | 0.00     | 0.973   | 0.991   |
| Endophytes, Shelf-life, Basil EO       | Endophytes, Storage, Chemical control     | 8           | 2.63      | 0.170   | 0.212   | 1.06     | 0.326   | 0.549   |
| Endophytes, Shelf-life, Basil EO       | Endophytes, Storage, Untreated control    | 7           | 4.15      | 0.059   | 0.081   | 2.06     | 0.348   | 0.566   |
| Endophytes, Shelf-life, Basil EO       | Epiphytes, Harvest, Untreated control     | 9           | 12.65     | 0.018   | 0.033   | 1.13     | 0.084   | 0.294   |
| Endophytes, Shelf-life, Basil EO       | Epiphytes, Shelf-life, Basil EO           | 9           | 55.03     | 0.013   | 0.033   | 0.19     | 0.392   | 0.605   |
| Endophytes, Shelf-life, Basil EO       | Epiphytes, Shelf-life, Chemical control   | 9           | 97.06     | 0.009   | 0.033   | 1.90     | 0.005   | 0.100   |

**Table S3.** (continued)

| Group 1                                   | Group 2                                   | Sample size | PERMANOVA |         |         | PERMADISP |         |         |
|-------------------------------------------|-------------------------------------------|-------------|-----------|---------|---------|-----------|---------|---------|
|                                           |                                           |             | pseudo-F  | p-value | q-value | F-value   | p-value | q-value |
| Endophytes, Shelf-life, Basil EO          | Epiphytes, Shelf-life, Untreated control  | 9           | 47.78     | 0.008   | 0.033   | 0.03      | 0.774   | 0.870   |
| Endophytes, Shelf-life, Basil EO          | Epiphytes, Storage, Basil EO              | 9           | 30.13     | 0.014   | 0.033   | 0.30      | 0.336   | 0.556   |
| Endophytes, Shelf-life, Basil EO          | Epiphytes, Storage, Chemical control      | 9           | 56.69     | 0.005   | 0.033   | 0.53      | 0.199   | 0.455   |
| Endophytes, Shelf-life, Basil EO          | Epiphytes, Storage, Untreated control     | 9           | 6.70      | 0.007   | 0.033   | 1.50      | 0.283   | 0.495   |
| Endophytes, Shelf-life, Chemical control  | Endophytes, Shelf-life, Untreated control | 8           | 0.24      | 0.794   | 0.860   | 0.03      | 0.823   | 0.902   |
| Endophytes, Shelf-life, Chemical control  | Endophytes, Storage, Basil EO             | 6           | 0.88      | 0.607   | 0.674   | 0.83      | 0.251   | 0.486   |
| Endophytes, Shelf-life, Chemical control  | Endophytes, Storage, Chemical control     | 7           | 4.04      | 0.093   | 0.124   | 0.00      | 1.000   | 1.000   |
| Endophytes, Shelf-life, Chemical control  | Endophytes, Storage, Untreated control    | 6           | 4.91      | 0.116   | 0.149   | 0.28      | 0.524   | 0.712   |
| Endophytes, Shelf-life, Chemical control  | Epiphytes, Harvest, Untreated control     | 8           | 10.49     | 0.016   | 0.033   | 0.12      | 0.528   | 0.712   |
| Endophytes, Shelf-life, Chemical control  | Epiphytes, Shelf-life, Basil EO           | 8           | 35.30     | 0.017   | 0.033   | 4.48      | 0.180   | 0.455   |
| Endophytes, Shelf-life, Chemical control  | Epiphytes, Shelf-life, Chemical control   | 8           | 35.97     | 0.022   | 0.036   | 17.23     | 0.020   | 0.121   |
| Endophytes, Shelf-life, Chemical control  | Epiphytes, Shelf-life, Untreated control  | 8           | 26.86     | 0.018   | 0.033   | 1.85      | 0.211   | 0.455   |
| Endophytes, Shelf-life, Chemical control  | Epiphytes, Storage, Basil EO              | 8           | 18.81     | 0.017   | 0.033   | 4.54      | 0.219   | 0.455   |
| Endophytes, Shelf-life, Chemical control  | Epiphytes, Storage, Chemical control      | 8           | 23.88     | 0.014   | 0.033   | 4.64      | 0.105   | 0.329   |
| Endophytes, Shelf-life, Chemical control  | Epiphytes, Storage, Untreated control     | 8           | 5.23      | 0.058   | 0.081   | 0.51      | 0.560   | 0.712   |
| Endophytes, Shelf-life, Untreated control | Endophytes, Storage, Basil EO             | 8           | 0.32      | 0.858   | 0.919   | 0.19      | 0.732   | 0.843   |
| Endophytes, Shelf-life, Untreated control | Endophytes, Storage, Chemical control     | 9           | 2.88      | 0.127   | 0.161   | 0.03      | 0.879   | 0.919   |
| Endophytes, Shelf-life, Untreated control | Endophytes, Storage, Untreated control    | 8           | 4.22      | 0.058   | 0.081   | 0.27      | 0.576   | 0.718   |
| Endophytes, Shelf-life, Untreated control | Epiphytes, Harvest, Untreated control     | 10          | 11.78     | 0.010   | 0.033   | 0.24      | 0.392   | 0.605   |
| Endophytes, Shelf-life, Untreated control | Epiphytes, Shelf-life, Basil EO           | 10          | 29.01     | 0.009   | 0.033   | 0.82      | 0.011   | 0.100   |
| Endophytes, Shelf-life, Untreated control | Epiphytes, Shelf-life, Chemical control   | 10          | 34.79     | 0.004   | 0.033   | 1.88      | 0.008   | 0.100   |

**Table S3.** (continued)

| Group 1                                   | Group 2                                  | Sample size | PERMANOVA |         |         | PERMADISP |         |         |
|-------------------------------------------|------------------------------------------|-------------|-----------|---------|---------|-----------|---------|---------|
|                                           |                                          |             | pseudo-F  | p-value | q-value | F-value   | p-value | q-value |
| Endophytes, Shelf-life, Untreated control | Epiphytes, Shelf-life, Untreated control | 10          | 25.10     | 0.009   | 0.033   | 0.52      | 0.058   | 0.245   |
| Endophytes, Shelf-life, Untreated control | Epiphytes, Storage, Basil EO             | 10          | 14.88     | 0.008   | 0.033   | 0.95      | 0.084   | 0.294   |
| Endophytes, Shelf-life, Untreated control | Epiphytes, Storage, Chemical control     | 10          | 23.30     | 0.008   | 0.033   | 1.19      | 0.014   | 0.104   |
| Endophytes, Shelf-life, Untreated control | Epiphytes, Storage, Untreated control    | 10          | 6.99      | 0.010   | 0.033   | 0.91      | 0.384   | 0.605   |
| Endophytes, Storage, Basil EO             | Endophytes, Storage, Chemical control    | 7           | 2.18      | 0.191   | 0.235   | 0.65      | 0.225   | 0.455   |
| Endophytes, Storage, Basil EO             | Endophytes, Storage, Untreated control   | 6           | 2.99      | 0.098   | 0.127   | 1.31      | 0.274   | 0.495   |
| Endophytes, Storage, Basil EO             | Epiphytes, Harvest, Untreated control    | 8           | 10.47     | 0.016   | 0.033   | 0.75      | 0.233   | 0.461   |
| Endophytes, Storage, Basil EO             | Epiphytes, Shelf-life, Basil EO          | 8           | 48.11     | 0.016   | 0.033   | 0.20      | 0.467   | 0.685   |
| Endophytes, Storage, Basil EO             | Epiphytes, Shelf-life, Chemical control  | 8           | 86.96     | 0.024   | 0.038   | 1.56      | 0.201   | 0.455   |
| Endophytes, Storage, Basil EO             | Epiphytes, Shelf-life, Untreated control | 8           | 42.18     | 0.021   | 0.036   | 0.04      | 0.654   | 0.785   |
| Endophytes, Storage, Basil EO             | Epiphytes, Storage, Basil EO             | 8           | 27.81     | 0.018   | 0.033   | 0.29      | 0.414   | 0.628   |
| Endophytes, Storage, Basil EO             | Epiphytes, Storage, Chemical control     | 8           | 51.13     | 0.020   | 0.036   | 0.47      | 0.219   | 0.455   |
| Endophytes, Storage, Basil EO             | Epiphytes, Storage, Untreated control    | 8           | 5.57      | 0.025   | 0.039   | 1.04      | 0.274   | 0.495   |
| Endophytes, Storage, Chemical control     | Endophytes, Storage, Untreated control   | 7           | 0.49      | 0.629   | 0.690   | 0.23      | 0.557   | 0.712   |
| Endophytes, Storage, Chemical control     | Epiphytes, Harvest, Untreated control    | 9           | 5.85      | 0.016   | 0.033   | 0.13      | 0.548   | 0.712   |
| Endophytes, Storage, Chemical control     | Epiphytes, Shelf-life, Basil EO          | 9           | 18.71     | 0.004   | 0.033   | 2.75      | 0.050   | 0.239   |
| Endophytes, Storage, Chemical control     | Epiphytes, Shelf-life, Chemical control  | 9           | 57.39     | 0.007   | 0.033   | 6.58      | 0.010   | 0.100   |
| Endophytes, Storage, Chemical control     | Epiphytes, Shelf-life, Untreated control | 9           | 24.28     | 0.010   | 0.033   | 1.54      | 0.062   | 0.245   |
| Endophytes, Storage, Chemical control     | Epiphytes, Storage, Basil EO             | 9           | 11.52     | 0.008   | 0.033   | 2.97      | 0.056   | 0.245   |
| Endophytes, Storage, Chemical control     | Epiphytes, Storage, Chemical control     | 9           | 35.06     | 0.012   | 0.033   | 3.35      | 0.025   | 0.142   |
| Endophytes, Storage, Chemical control     | Epiphytes, Storage, Untreated control    | 9           | 4.47      | 0.031   | 0.046   | 0.66      | 0.317   | 0.544   |

**Table S3.** (continued)

| Group 1                                 | Group 2                                  | Sample size | PERMANOVA |         |         | PERMADISP |         |         |
|-----------------------------------------|------------------------------------------|-------------|-----------|---------|---------|-----------|---------|---------|
|                                         |                                          |             | pseudo-F  | p-value | q-value | F-value   | p-value | q-value |
| Endophytes, Storage, Untreated control  | Epiphytes, Harvest, Untreated control    | 8           | 5.39      | 0.023   | 0.037   | 0.00      | 0.980   | 0.991   |
| Endophytes, Storage, Untreated control  | Epiphytes, Shelf-life, Basil EO          | 8           | 16.83     | 0.020   | 0.036   | 4.62      | 0.188   | 0.455   |
| Endophytes, Storage, Untreated control  | Epiphytes, Shelf-life, Chemical control  | 8           | 55.55     | 0.022   | 0.036   | 9.55      | 0.014   | 0.104   |
| Endophytes, Storage, Untreated control  | Epiphytes, Shelf-life, Untreated control | 8           | 24.19     | 0.013   | 0.033   | 2.75      | 0.195   | 0.455   |
| Endophytes, Storage, Untreated control  | Epiphytes, Storage, Basil EO             | 8           | 12.98     | 0.018   | 0.033   | 4.77      | 0.172   | 0.455   |
| Endophytes, Storage, Untreated control  | Epiphytes, Storage, Chemical control     | 8           | 35.80     | 0.024   | 0.038   | 5.02      | 0.155   | 0.455   |
| Endophytes, Storage, Untreated control  | Epiphytes, Storage, Untreated control    | 8           | 4.47      | 0.058   | 0.081   | 0.24      | 0.541   | 0.712   |
| Epiphytes, Harvest, Untreated control   | Epiphytes, Shelf-life, Basil EO          | 10          | 0.57      | 0.521   | 0.600   | 2.16      | 0.103   | 0.329   |
| Epiphytes, Harvest, Untreated control   | Epiphytes, Shelf-life, Chemical control  | 10          | 31.05     | 0.008   | 0.033   | 3.64      | 0.006   | 0.100   |
| Epiphytes, Harvest, Untreated control   | Epiphytes, Shelf-life, Untreated control | 10          | 5.71      | 0.051   | 0.075   | 1.63      | 0.060   | 0.245   |
| Epiphytes, Harvest, Untreated control   | Epiphytes, Storage, Basil EO             | 10          | 1.72      | 0.220   | 0.267   | 2.33      | 0.082   | 0.294   |
| Epiphytes, Harvest, Untreated control   | Epiphytes, Storage, Chemical control     | 10          | 16.74     | 0.018   | 0.033   | 2.65      | 0.006   | 0.100   |
| Epiphytes, Harvest, Untreated control   | Epiphytes, Storage, Untreated control    | 10          | 0.69      | 0.404   | 0.484   | 0.37      | 0.283   | 0.495   |
| Epiphytes, Shelf-life, Basil EO         | Epiphytes, Shelf-life, Chemical control  | 10          | 146.32    | 0.010   | 0.033   | 1.61      | 0.008   | 0.100   |
| Epiphytes, Shelf-life, Basil EO         | Epiphytes, Shelf-life, Untreated control | 10          | 13.65     | 0.012   | 0.033   | 0.06      | 0.769   | 0.870   |
| Epiphytes, Shelf-life, Basil EO         | Epiphytes, Storage, Basil EO             | 10          | 8.62      | 0.022   | 0.036   | 0.03      | 0.858   | 0.914   |
| Epiphytes, Shelf-life, Basil EO         | Epiphytes, Storage, Chemical control     | 10          | 65.23     | 0.007   | 0.033   | 0.19      | 0.177   | 0.455   |
| Epiphytes, Shelf-life, Basil EO         | Epiphytes, Storage, Untreated control    | 10          | 0.50      | 0.532   | 0.605   | 2.35      | 0.045   | 0.228   |
| Epiphytes, Shelf-life, Chemical control | Epiphytes, Shelf-life, Untreated control | 10          | 48.39     | 0.012   | 0.033   | 1.23      | 0.015   | 0.104   |
| Epiphytes, Shelf-life, Chemical control | Epiphytes, Storage, Basil EO             | 10          | 94.92     | 0.008   | 0.033   | 0.90      | 0.004   | 0.100   |
| Epiphytes, Shelf-life, Chemical control | Epiphytes, Storage, Chemical control     | 10          | 11.75     | 0.011   | 0.033   | 0.23      | 0.588   | 0.723   |

**Table S3.** (continued)

| Group 1                                  | Group 2                               | Sample size | PERMANOVA |         |         | PERMADISP |         |         |
|------------------------------------------|---------------------------------------|-------------|-----------|---------|---------|-----------|---------|---------|
|                                          |                                       |             | pseudo-F  | p-value | q-value | F-value   | p-value | q-value |
| Epiphytes, Shelf-life, Chemical control  | Epiphytes, Storage, Untreated control | 10          | 8.98      | 0.007   | 0.033   | 3.12      | 0.182   | 0.455   |
| Epiphytes, Shelf-life, Untreated control | Epiphytes, Storage, Basil EO          | 10          | 9.18      | 0.010   | 0.033   | 0.13      | 0.539   | 0.712   |
| Epiphytes, Shelf-life, Untreated control | Epiphytes, Storage, Chemical control  | 10          | 15.52     | 0.011   | 0.033   | 0.32      | 0.501   | 0.712   |
| Epiphytes, Shelf-life, Untreated control | Epiphytes, Storage, Untreated control | 10          | 0.55      | 0.478   | 0.558   | 2.06      | 0.225   | 0.455   |
| Epiphytes, Storage, Basil EO             | Epiphytes, Storage, Chemical control  | 10          | 34.96     | 0.007   | 0.033   | 0.07      | 0.656   | 0.785   |
| Epiphytes, Storage, Basil EO             | Epiphytes, Storage, Untreated control | 10          | 0.51      | 0.554   | 0.622   | 2.46      | 0.175   | 0.455   |
| Epiphytes, Storage, Chemical control     | Epiphytes, Storage, Untreated control | 10          | 4.17      | 0.027   | 0.041   | 2.67      | 0.130   | 0.394   |
